# Supplementary material for: NCOA4: An Immunomodulation-Related Prognostic Biomarker in Colon Adenocarcinoma and Pan-Cancer
Source: Hindawi journal article supplement (doi:10.1155/2022/5242437), 2022-06-16
Supplement: f1 [file 5242437.f1.zip]

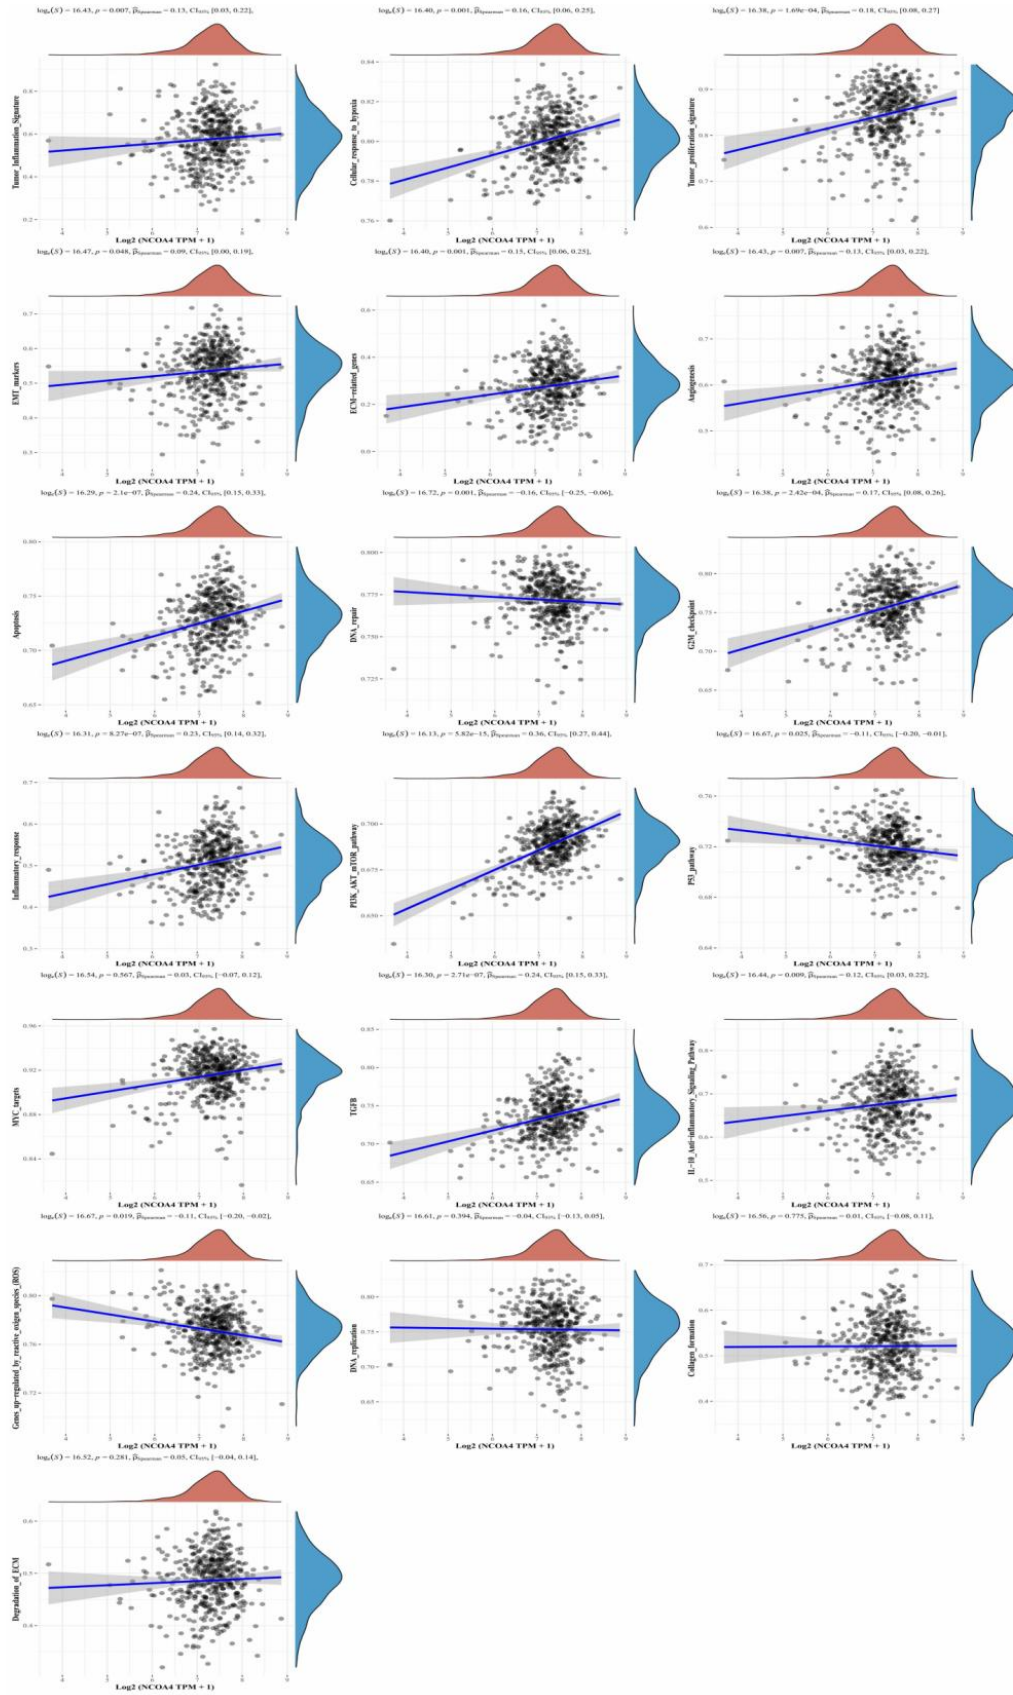

**Figure S1. NCOA4-related genes hallmark enrichment pathway of COAD in the**

**TCGA database.**

The relationship between NCOA4-related genes and traditional pathways, including Tumor\_Inflammation\_Signature, Cellular\_response\_to\_hypoxia, Tumor\_proliferation\_signature, EMT\_markers, ECM-related\_genes, Angiogenesis, Apoptosis, DNA\_repair, G2M\_checkpoint, Inflammatory\_response, PI3K\_AKT\_mTOR\_pathway, P53\_pathway, MYC\_targets, TGFB, IL-10\_Anti-inflammatory\_Signaling\_Pathway, Genes\_up-regulated\_by\_reactive\_oxygen\_species\_(ROS), DNA\_replication, Collagen\_formation, Degradation\_of\_ECM. The  $r$  range from -1 to 1, where  $|r| \geq 0.7$  signifies a high positive correlation,  $0.5 \leq |r| < 0.7$  is a moderate positive correlation,  $0.3 \leq |r| < 0.5$  is a low positive correlation, and  $|r| < 0.3$  is a negligible correlation.

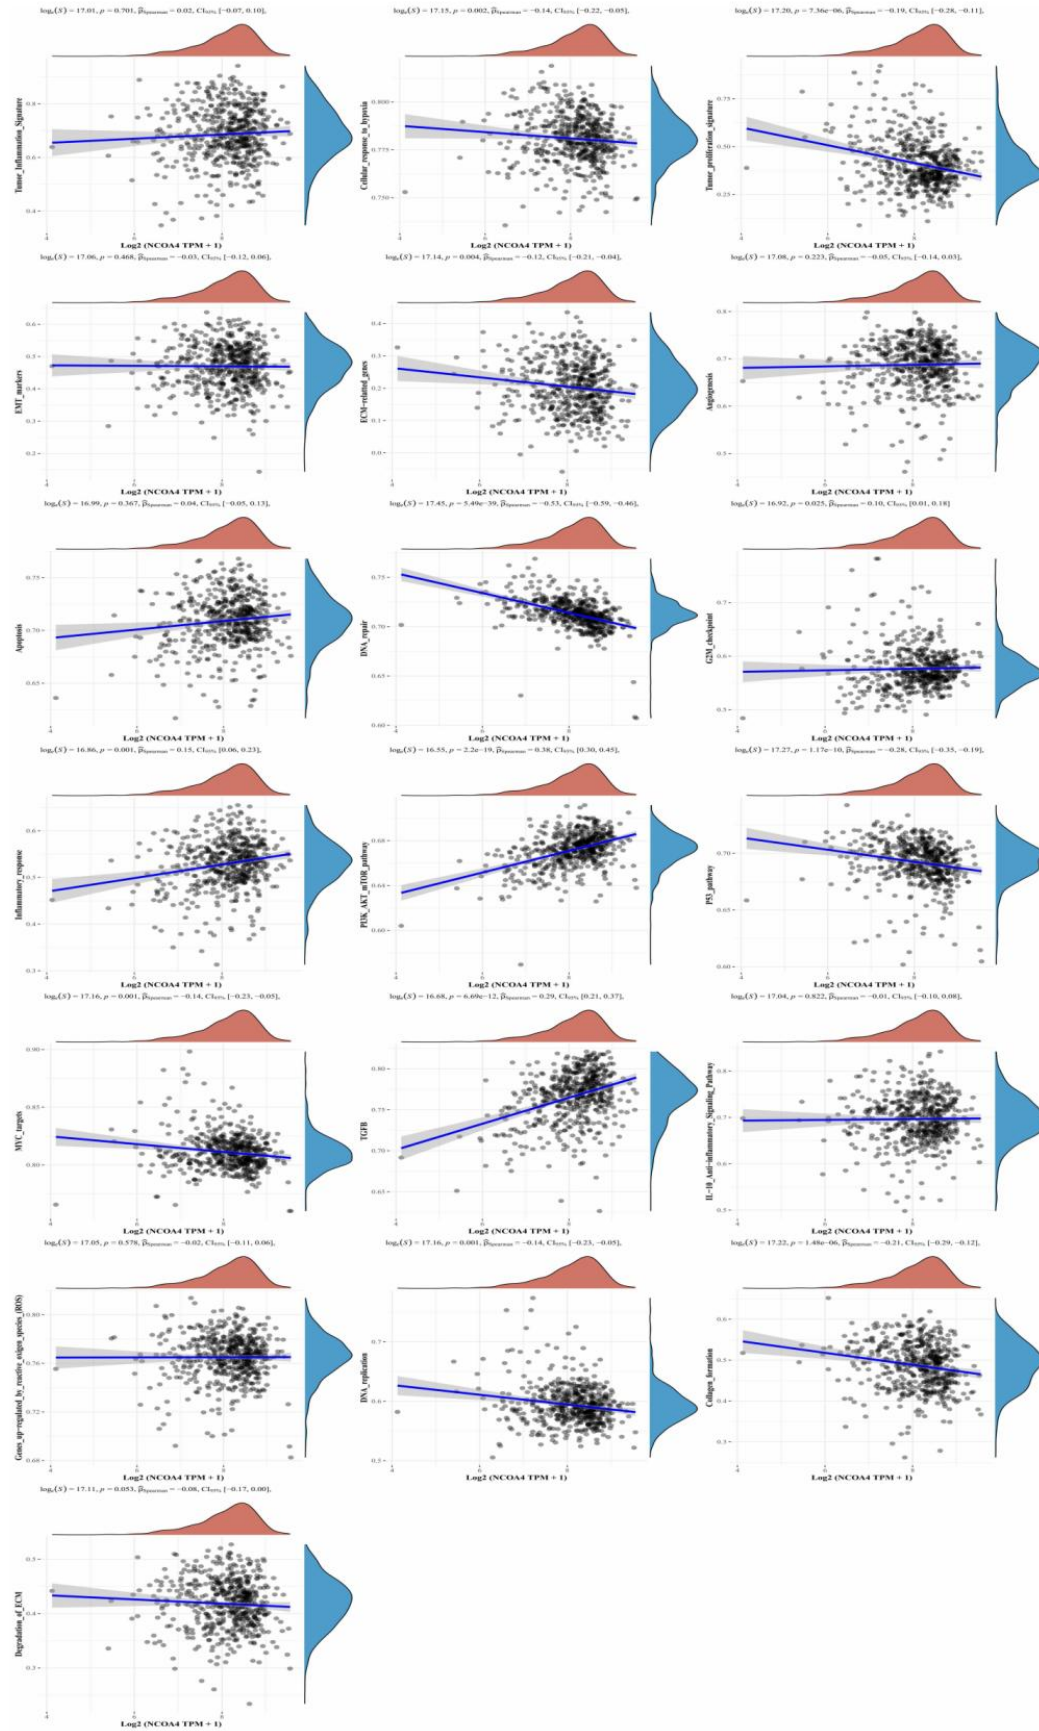

**Figure S2. NCOA4-related genes hallmark enrichment pathway of KIRC in the**

**TCGA database.**

Tumor\_Inflammation\_Signature, Cellular\_response\_to\_hypoxia,  
Tumor\_proliferation\_signature, EMT\_markers, ECM-related\_genes, Angiogenesis,  
Apoptosis, DNA\_repair, G2M\_checkpoint, Inflammatory\_response,  
PI3K\_AKT\_mTOR\_pathway, P53\_pathway, MYC\_targets, TGFB,  
IL-10\_Anti-inflammatory\_Signaling\_Pathway,  
Genes\_up-regulated\_by\_reactive\_oxygen\_species\_(ROS), DNA\_replication,  
Collagen\_formation, Degradation\_of\_ECM. The  $r$  range from -1 to 1, where  $|r| \geq 0.7$   
signifies a high positive correlation,  $0.5 \leq |r| < 0.7$  is a moderate positive correlation,  
 $0.3 \leq |r| < 0.5$  is a low positive correlation, and  $|r| < 0.3$  is a negligible correlation.
