# Supplementary material for: NCOA4: An Immunomodulation-Related Prognostic Biomarker in Colon Adenocarcinoma and Pan-Cancer
Source: Hindawi journal article supplement (doi:10.1155/2022/5242437), 2022-06-16
Supplement: f1 [file 5242437.f1.zip]

**Table S1 Abbreviations for cancer in TCGA**

| <b>Cancer type</b>                              | <b>Abbreviations</b> |
|-------------------------------------------------|----------------------|
| adrenocortical carcinoma                        | ACC                  |
| bladder urothelial carcinoma                    | BLCA                 |
| breast invasive carcinoma                       | BRCA                 |
| cervical squamous cell carcinoma                | CESC                 |
| cholangiocarcinoma                              | CHOL                 |
| colon adenocarcinoma                            | COAD                 |
| lymphoid neoplasm diffuse large B cell lymphoma | DLBC                 |
| esophageal carcinoma                            | ESCA                 |
| glioblastoma                                    | GBM                  |
| brain lower grade glioma                        | LGG                  |
| head and neck squamous cell carcinoma           | HNSC                 |
| kidney chromophobe                              | KICH                 |
| kidney renal clear cell carcinoma               | KIRC                 |
| kidney renal papillary cell carcinoma           | KIRP                 |
| acute myeloid leukemia                          | LAML                 |
| liver hepatocellular carcinoma                  | LIHC                 |
| lung adenocarcinoma                             | LUAD                 |
| lung squamous cell carcinoma                    | LUSC                 |
| mesothelioma                                    | MESO                 |
| ovarian serous cystadenocarcinoma               | OV                   |
| pancreatic adenocarcinoma                       | PAAD                 |
| pheochromocytoma and paraganglioma              | PCPG                 |
| prostate adenocarcinoma                         | PRAD                 |
| rectum adenocarcinoma                           | READ                 |
| sarcoma                                         | SARC                 |
| skin cutaneous melanoma                         | SKCM                 |
| stomach adenocarcinoma                          | STAD                 |
| testicular germ cell tumors                     | TGCT                 |
| thyroid carcinoma                               | THCA                 |
| thymoma                                         | THYM                 |
| uterine corpus endometrial carcinoma            | UCEC                 |
| uterine carcinosarcoma                          | UCS                  |
| uvea melanoma                                   | UVM                  |

**Table S2 The relationship between clinical features and NCOA4 expression levels in COAD**

| Characteristic          | NCOA4 <sup>low</sup> | NCOA4 <sup>high</sup> | p     |
|-------------------------|----------------------|-----------------------|-------|
| n                       | 239                  | 239                   |       |
| Age, n (%)              |                      |                       | 1.000 |
| <=65                    | 97 (20.3%)           | 97 (20.3%)            |       |
| >65                     | 142 (29.7%)          | 142 (29.7%)           |       |
| Gender, n (%)           |                      |                       | 0.647 |
| Female                  | 116 (24.3%)          | 110 (23%)             |       |
| Male                    | 123 (25.7%)          | 129 (27%)             |       |
| Pathologic stage, n (%) |                      |                       | 0.188 |
| Stage I                 | 40 (8.6%)            | 41 (8.8%)             |       |
| Stage II                | 83 (17.8%)           | 104 (22.3%)           |       |
| Stage III               | 72 (15.4%)           | 61 (13.1%)            |       |
| Stage IV                | 38 (8.1%)            | 28 (6%)               |       |
| T stage, n (%)          |                      |                       | 0.978 |
| T1                      | 5 (1%)               | 6 (1.3%)              |       |
| T2                      | 41 (8.6%)            | 42 (8.8%)             |       |
| T3                      | 163 (34.2%)          | 160 (33.5%)           |       |
| T4                      | 29 (6.1%)            | 31 (6.5%)             |       |
| N stage, n (%)          |                      |                       | 0.126 |
| N0                      | 133 (27.8%)          | 151 (31.6%)           |       |
| N1                      | 63 (13.2%)           | 45 (9.4%)             |       |
| N2                      | 43 (9%)              | 43 (9%)               |       |
| M stage, n (%)          |                      |                       | 0.175 |
| M0                      | 166 (40%)            | 183 (44.1%)           |       |
| M1                      | 38 (9.2%)            | 28 (6.7%)             |       |
| OS event, n (%)         |                      |                       | 0.002 |
| Alive                   | 173 (36.2%)          | 202 (42.3%)           |       |
| Dead                    | 66 (13.8%)           | 37 (7.7%)             |       |
| DSS event, n (%)        |                      |                       | 0.027 |
| Alive                   | 186 (40.3%)          | 212 (45.9%)           |       |
| Dead                    | 40 (8.7%)            | 24 (5.2%)             |       |

**Table S3 The relationship between clinical features and NCOA4 expression levels in KIRC**

| Characteristic          | NCOA4 <sup>low</sup> | NCOA4 <sup>high</sup> | p       |
|-------------------------|----------------------|-----------------------|---------|
| n                       | 269                  | 270                   |         |
| Age, n (%)              |                      |                       | 0.322   |
| <=60                    | 128 (23.7%)          | 141 (26.2%)           |         |
| >60                     | 141 (26.2%)          | 129 (23.9%)           |         |
| Gender, n (%)           |                      |                       | 0.002   |
| Female                  | 75 (13.9%)           | 111 (20.6%)           |         |
| Male                    | 194 (36%)            | 159 (29.5%)           |         |
| Pathologic stage, n (%) |                      |                       | < 0.001 |
| Stage I                 | 114 (21.3%)          | 158 (29.5%)           |         |
| Stage II                | 30 (5.6%)            | 29 (5.4%)             |         |
| Stage III               | 68 (12.7%)           | 55 (10.3%)            |         |
| Stage IV                | 55 (10.3%)           | 27 (5%)               |         |
| T stage, n (%)          |                      |                       | < 0.001 |
| T1                      | 116 (21.5%)          | 162 (30.1%)           |         |
| T2                      | 40 (7.4%)            | 31 (5.8%)             |         |
| T3                      | 104 (19.3%)          | 75 (13.9%)            |         |
| T4                      | 9 (1.7%)             | 2 (0.4%)              |         |
| N stage, n (%)          |                      |                       | 1.000   |
| N0                      | 114 (44.4%)          | 127 (49.4%)           |         |
| N1                      | 8 (3.1%)             | 8 (3.1%)              |         |
| M stage, n (%)          |                      |                       | 0.002   |
| M0                      | 195 (38.5%)          | 233 (46%)             |         |
| M1                      | 51 (10.1%)           | 27 (5.3%)             |         |
| OS event, n (%)         |                      |                       | < 0.001 |
| Alive                   | 153 (28.4%)          | 213 (39.5%)           |         |
| Dead                    | 116 (21.5%)          | 57 (10.6%)            |         |
| DSS event, n (%)        |                      |                       | < 0.001 |
| Alive                   | 183 (34.7%)          | 237 (44.9%)           |         |
| Dead                    | 79 (15%)             | 29 (5.5%)             |         |

**Table S4 The relationship between clinical features and NCOA4 expression levels in LIHC**

| Characteristic          | NCOA4 <sup>low</sup> | NCOA4 <sup>high</sup> | p     |
|-------------------------|----------------------|-----------------------|-------|
| n                       | 187                  | 187                   |       |
| Age, n (%)              |                      |                       | 0.043 |
| <=60                    | 78 (20.9%)           | 99 (26.5%)            |       |
| >60                     | 108 (29%)            | 88 (23.6%)            |       |
| Gender, n (%)           |                      |                       | 0.507 |
| Female                  | 57 (15.2%)           | 64 (17.1%)            |       |
| Male                    | 130 (34.8%)          | 123 (32.9%)           |       |
| Pathologic stage, n (%) |                      |                       | 0.808 |
| Stage I                 | 89 (25.4%)           | 84 (24%)              |       |
| Stage II                | 43 (12.3%)           | 44 (12.6%)            |       |
| Stage III               | 39 (11.1%)           | 46 (13.1%)            |       |
| Stage IV                | 3 (0.9%)             | 2 (0.6%)              |       |
| T stage, n (%)          |                      |                       | 0.852 |
| T1                      | 92 (24.8%)           | 91 (24.5%)            |       |
| T2                      | 46 (12.4%)           | 49 (13.2%)            |       |
| T3                      | 40 (10.8%)           | 40 (10.8%)            |       |
| T4                      | 8 (2.2%)             | 5 (1.3%)              |       |
| N stage, n (%)          |                      |                       | 0.125 |
| N0                      | 121 (46.9%)          | 133 (51.6%)           |       |
| N1                      | 0 (0%)               | 4 (1.6%)              |       |
| M stage, n (%)          |                      |                       | 0.351 |
| M0                      | 127 (46.7%)          | 141 (51.8%)           |       |
| M1                      | 3 (1.1%)             | 1 (0.4%)              |       |
| OS event, n (%)         |                      |                       | 0.745 |
| Alive                   | 120 (32.1%)          | 124 (33.2%)           |       |
| Dead                    | 67 (17.9%)           | 63 (16.8%)            |       |
| DSS event, n (%)        |                      |                       | 0.956 |
| Alive                   | 142 (38.8%)          | 145 (39.6%)           |       |
| Dead                    | 40 (10.9%)           | 39 (10.7%)            |       |
| Age, meidan (IQR)       | 64 (53, 69.75)       | 59 (51, 68)           | 0.020 |

**Table S5 The relationship between clinical features and NCOA4 expression levels in BRCA**

| Characteristic          | NCOA4 <sup>low</sup> | NCOA4 <sup>high</sup> | p       |
|-------------------------|----------------------|-----------------------|---------|
| n                       | 541                  | 542                   |         |
| Age, n (%)              |                      |                       | 0.411   |
| <=60                    | 293 (27.1%)          | 308 (28.4%)           |         |
| >60                     | 248 (22.9%)          | 234 (21.6%)           |         |
| Pathologic stage, n (%) |                      |                       | 0.834   |
| Stage I                 | 90 (8.5%)            | 91 (8.6%)             |         |
| Stage II                | 318 (30%)            | 301 (28.4%)           |         |
| Stage III               | 117 (11%)            | 125 (11.8%)           |         |
| Stage IV                | 10 (0.9%)            | 8 (0.8%)              |         |
| T stage, n (%)          |                      |                       | 0.357   |
| T1                      | 128 (11.9%)          | 149 (13.8%)           |         |
| T2                      | 324 (30%)            | 305 (28.2%)           |         |
| T3                      | 73 (6.8%)            | 66 (6.1%)             |         |
| T4                      | 15 (1.4%)            | 20 (1.9%)             |         |
| N stage, n (%)          |                      |                       | < 0.001 |
| N0                      | 286 (26.9%)          | 228 (21.4%)           |         |
| N1                      | 153 (14.4%)          | 205 (19.3%)           |         |
| N2                      | 51 (4.8%)            | 65 (6.1%)             |         |
| N3                      | 42 (3.9%)            | 34 (3.2%)             |         |
| M stage, n (%)          |                      |                       | 0.658   |
| M0                      | 428 (46.4%)          | 474 (51.4%)           |         |
| M1                      | 11 (1.2%)            | 9 (1%)                |         |
| OS event, n (%)         |                      |                       | 0.046   |
| Alive                   | 477 (44%)            | 454 (41.9%)           |         |
| Dead                    | 64 (5.9%)            | 88 (8.1%)             |         |
| DSS event, n (%)        |                      |                       | 0.437   |
| Alive                   | 498 (46.8%)          | 480 (45.2%)           |         |
| Dead                    | 39 (3.7%)            | 46 (4.3%)             |         |
| Age, median (IQR)       | 59 (49, 68)          | 58 (48, 67)           | 0.225   |

**Table S6 The relationship between clinical features and NCOA4 expression levels in CESC**

| Characteristic        | NCOA4 <sup>low</sup> | NCOA4 <sup>high</sup> | p       |
|-----------------------|----------------------|-----------------------|---------|
| n                     | 153                  | 153                   |         |
| Age, n (%)            |                      |                       | 0.003   |
| <=50                  | 81 (26.5%)           | 107 (35%)             |         |
| >50                   | 72 (23.5%)           | 46 (15%)              |         |
| Clinical stage, n (%) |                      |                       | 0.768   |
| Stage I               | 78 (26.1%)           | 84 (28.1%)            |         |
| Stage II              | 33 (11%)             | 36 (12%)              |         |
| Stage III             | 24 (8%)              | 22 (7.4%)             |         |
| Stage IV              | 13 (4.3%)            | 9 (3%)                |         |
| T stage, n (%)        |                      |                       | 0.823   |
| T1                    | 67 (27.6%)           | 73 (30%)              |         |
| T2                    | 38 (15.6%)           | 34 (14%)              |         |
| T3                    | 11 (4.5%)            | 10 (4.1%)             |         |
| T4                    | 6 (2.5%)             | 4 (1.6%)              |         |
| N stage, n (%)        |                      |                       | 1.000   |
| N0                    | 65 (33.3%)           | 69 (35.4%)            |         |
| N1                    | 30 (15.4%)           | 31 (15.9%)            |         |
| M stage, n (%)        |                      |                       | 0.935   |
| M0                    | 60 (47.2%)           | 56 (44.1%)            |         |
| M1                    | 5 (3.9%)             | 6 (4.7%)              |         |
| OS event, n (%)       |                      |                       | 0.345   |
| Alive                 | 121 (39.5%)          | 113 (36.9%)           |         |
| Dead                  | 32 (10.5%)           | 40 (13.1%)            |         |
| DSS event, n (%)      |                      |                       | 0.551   |
| Alive                 | 126 (41.7%)          | 121 (40.1%)           |         |
| Dead                  | 25 (8.3%)            | 30 (9.9%)             |         |
| Age, median (IQR)     | 49 (42, 60)          | 44 (35, 54)           | < 0.001 |

**Table S7 The relationship between clinical features and NCOA4 expression levels in CHOL**

| Characteristic          | NCOA4 <sup>low</sup> | NCOA4 <sup>high</sup> | p     |
|-------------------------|----------------------|-----------------------|-------|
| n                       | 18                   | 18                    |       |
| Age, n (%)              |                      |                       | 0.505 |
| ≤65                     | 7 (19.4%)            | 10 (27.8%)            |       |
| >65                     | 11 (30.6%)           | 8 (22.2%)             |       |
| Gender, n (%)           |                      |                       | 1.000 |
| Female                  | 10 (27.8%)           | 10 (27.8%)            |       |
| Male                    | 8 (22.2%)            | 8 (22.2%)             |       |
| Pathologic stage, n (%) |                      |                       | 0.357 |
| Stage I                 | 9 (25%)              | 10 (27.8%)            |       |
| Stage II                | 3 (8.3%)             | 6 (16.7%)             |       |
| Stage III               | 1 (2.8%)             | 0 (0%)                |       |
| Stage IV                | 5 (13.9%)            | 2 (5.6%)              |       |
| T stage, n (%)          |                      |                       | 0.436 |
| T1                      | 9 (25%)              | 10 (27.8%)            |       |
| T2                      | 5 (13.9%)            | 7 (19.4%)             |       |
| T3                      | 4 (11.1%)            | 1 (2.8%)              |       |
| T4                      | 0 (0%)               | 0 (0%)                |       |
| N stage, n (%)          |                      |                       | 0.636 |
| N0                      | 11 (35.5%)           | 15 (48.4%)            |       |
| N1                      | 3 (9.7%)             | 2 (6.5%)              |       |
| M stage, n (%)          |                      |                       | 0.175 |
| M0                      | 12 (36.4%)           | 16 (48.5%)            |       |
| M1                      | 4 (12.1%)            | 1 (3%)                |       |
| OS event, n (%)         |                      |                       | 0.002 |
| Alive                   | 4 (11.1%)            | 14 (38.9%)            |       |
| Dead                    | 14 (38.9%)           | 4 (11.1%)             |       |
| DSS event, n (%)        |                      |                       | 0.007 |
| Alive                   | 5 (14.3%)            | 14 (40%)              |       |
| Dead                    | 12 (34.3%)           | 4 (11.4%)             |       |
| Age, mean ± SD          | 66.44 ± 9.19         | 59.61 ± 15.19         | 0.112 |

**Table S8 The relationship between clinical features and NCOA4 expression levels in LAML**

| Characteristic                      | NCOA4 <sup>low</sup> | NCOA4 <sup>high</sup> | p     |
|-------------------------------------|----------------------|-----------------------|-------|
| n                                   | 75                   | 76                    |       |
| Age, n (%)                          |                      |                       | 0.290 |
| <=60                                | 40 (26.5%)           | 48 (31.8%)            |       |
| >60                                 | 35 (23.2%)           | 28 (18.5%)            |       |
| Gender, n (%)                       |                      |                       | 0.928 |
| Female                              | 33 (21.9%)           | 35 (23.2%)            |       |
| Male                                | 42 (27.8%)           | 41 (27.2%)            |       |
| WBC count( $\times 10^9/L$ ), n (%) |                      |                       | 0.072 |
| <=20                                | 44 (29.3%)           | 33 (22%)              |       |
| >20                                 | 30 (20%)             | 43 (28.7%)            |       |
| FLT3 mutation, n (%)                |                      |                       | 0.014 |
| Negative                            | 58 (39.5%)           | 44 (29.9%)            |       |
| Positive                            | 15 (10.2%)           | 30 (20.4%)            |       |
| OS event, n (%)                     |                      |                       | 0.431 |
| Alive                               | 24 (15.9%)           | 30 (19.9%)            |       |
| Dead                                | 51 (33.8%)           | 46 (30.5%)            |       |
| Age, median (IQR)                   | 58 (43, 71)          | 55.5 (42, 64)         | 0.204 |



**Table S9 The relationship between clinical features and NCOA4 expression levels in LGG**

| Characteristic    | NCOA4 <sup>low</sup> | NCOA4 <sup>high</sup> | p       |
|-------------------|----------------------|-----------------------|---------|
| n                 | 264                  | 264                   |         |
| Age, n (%)        |                      |                       | < 0.001 |
| <=40              | 109 (20.6%)          | 155 (29.4%)           |         |
| >40               | 155 (29.4%)          | 109 (20.6%)           |         |
| Gender, n (%)     |                      |                       | 0.382   |
| Female            | 125 (23.7%)          | 114 (21.6%)           |         |
| Male              | 139 (26.3%)          | 150 (28.4%)           |         |
| WHO grade, n (%)  |                      |                       | 0.638   |
| G2                | 110 (23.6%)          | 114 (24.4%)           |         |
| G3                | 113 (24.2%)          | 130 (27.8%)           |         |
| OS event, n (%)   |                      |                       | 0.765   |
| Alive             | 194 (36.7%)          | 198 (37.5%)           |         |
| Dead              | 70 (13.3%)           | 66 (12.5%)            |         |
| DSS event, n (%)  |                      |                       | 0.568   |
| Alive             | 196 (37.7%)          | 201 (38.7%)           |         |
| Dead              | 65 (12.5%)           | 58 (11.2%)            |         |
| Age, median (IQR) | 44 (34, 55)          | 38 (31, 49)           | < 0.001 |

**Table S10 The relationship between clinical features and NCOA4 expression levels in PRAD**

| Characteristic   | NCOA4 <sup>low</sup> | NCOA4 <sup>high</sup> | p       |
|------------------|----------------------|-----------------------|---------|
| n                | 249                  | 250                   |         |
| Age, n (%)       |                      |                       | 0.010   |
| ≤60              | 97 (19.4%)           | 127 (25.5%)           |         |
| >60              | 152 (30.5%)          | 123 (24.6%)           |         |
| T stage, n (%)   |                      |                       | 0.267   |
| T2               | 85 (17.3%)           | 104 (21.1%)           |         |
| T3               | 153 (31.1%)          | 139 (28.3%)           |         |
| T4               | 6 (1.2%)             | 5 (1%)                |         |
| N stage, n (%)   |                      |                       | 0.152   |
| N0               | 164 (38.5%)          | 183 (43%)             |         |
| N1               | 45 (10.6%)           | 34 (8%)               |         |
| M stage, n (%)   |                      |                       | 0.123   |
| M0               | 225 (49.1%)          | 230 (50.2%)           |         |
| M1               | 3 (0.7%)             | 0 (0%)                |         |
| OS event, n (%)  |                      |                       | 0.544   |
| Alive            | 243 (48.7%)          | 246 (49.3%)           |         |
| Dead             | 6 (1.2%)             | 4 (0.8%)              |         |
| DSS event, n (%) |                      |                       | 0.686   |
| Alive            | 245 (49.3%)          | 247 (49.7%)           |         |
| Dead             | 3 (0.6%)             | 2 (0.4%)              |         |
| Age, mean ± SD   | 62.09 ± 6.28         | 59.97 ± 7.17          | < 0.001 |

**Table S11 The relationship between clinical features and NCOA4 expression levels in LUAD**

| Characteristic          | NCOA4 <sup>low</sup> | NCOA4 <sup>high</sup> | p     |
|-------------------------|----------------------|-----------------------|-------|
| n                       | 267                  | 268                   |       |
| Age, n (%)              |                      |                       | 0.134 |
| <=65                    | 138 (26.7%)          | 117 (22.7%)           |       |
| >65                     | 123 (23.8%)          | 138 (26.7%)           |       |
| Gender, n (%)           |                      |                       | 0.631 |
| Female                  | 146 (27.3%)          | 140 (26.2%)           |       |
| Male                    | 121 (22.6%)          | 128 (23.9%)           |       |
| Pathologic stage, n (%) |                      |                       | 0.314 |
| Stage I                 | 144 (27.3%)          | 150 (28.5%)           |       |
| Stage II                | 67 (12.7%)           | 56 (10.6%)            |       |
| Stage III               | 42 (8%)              | 42 (8%)               |       |
| Stage IV                | 9 (1.7%)             | 17 (3.2%)             |       |
| T stage, n (%)          |                      |                       | 0.337 |
| T1                      | 94 (17.7%)           | 81 (15.2%)            |       |
| T2                      | 138 (25.9%)          | 151 (28.4%)           |       |
| T3                      | 27 (5.1%)            | 22 (4.1%)             |       |
| T4                      | 7 (1.3%)             | 12 (2.3%)             |       |
| N stage, n (%)          |                      |                       | 0.807 |
| N0                      | 175 (33.7%)          | 173 (33.3%)           |       |
| N1                      | 52 (10%)             | 43 (8.3%)             |       |
| N2                      | 35 (6.7%)            | 39 (7.5%)             |       |
| N3                      | 1 (0.2%)             | 1 (0.2%)              |       |
| M stage, n (%)          |                      |                       | 0.304 |
| M0                      | 176 (45.6%)          | 185 (47.9%)           |       |
| M1                      | 9 (2.3%)             | 16 (4.1%)             |       |
| OS event, n (%)         |                      |                       | 0.022 |
| Alive                   | 158 (29.5%)          | 185 (34.6%)           |       |
| Dead                    | 109 (20.4%)          | 83 (15.5%)            |       |
| DSS event, n (%)        |                      |                       | 0.484 |
| Alive                   | 183 (36.7%)          | 196 (39.3%)           |       |
| Dead                    | 63 (12.6%)           | 57 (11.4%)            |       |
| Age, median (IQR)       | 65 (58, 72)          | 67 (59.5, 72.5)       | 0.122 |

**Table S12 The relationship between clinical features and NCOA4 expression levels in LUSC**

| Characteristic          | NCOA4 <sup>low</sup> | NCOA4 <sup>high</sup> | p     |
|-------------------------|----------------------|-----------------------|-------|
| n                       | 251                  | 251                   |       |
| Age, n (%)              |                      |                       | 0.825 |
| <=65                    | 94 (19.1%)           | 97 (19.7%)            |       |
| >65                     | 153 (31%)            | 149 (30.2%)           |       |
| Gender, n (%)           |                      |                       | 0.155 |
| Female                  | 73 (14.5%)           | 58 (11.6%)            |       |
| Male                    | 178 (35.5%)          | 193 (38.4%)           |       |
| Pathologic stage, n (%) |                      |                       | 0.020 |
| Stage I                 | 118 (23.7%)          | 127 (25.5%)           |       |
| Stage II                | 94 (18.9%)           | 68 (13.7%)            |       |
| Stage III               | 36 (7.2%)            | 48 (9.6%)             |       |
| Stage IV                | 1 (0.2%)             | 6 (1.2%)              |       |
| T stage, n (%)          |                      |                       | 0.841 |
| T1                      | 53 (10.6%)           | 61 (12.2%)            |       |
| T2                      | 151 (30.1%)          | 143 (28.5%)           |       |
| T3                      | 36 (7.2%)            | 35 (7%)               |       |
| T4                      | 11 (2.2%)            | 12 (2.4%)             |       |
| N stage, n (%)          |                      |                       | 0.348 |
| N0                      | 167 (33.7%)          | 153 (30.8%)           |       |
| N1                      | 64 (12.9%)           | 67 (13.5%)            |       |
| N2                      | 17 (3.4%)            | 23 (4.6%)             |       |
| N3                      | 1 (0.2%)             | 4 (0.8%)              |       |
| M stage, n (%)          |                      |                       | 0.130 |
| M0                      | 192 (45.8%)          | 220 (52.5%)           |       |
| M1                      | 1 (0.2%)             | 6 (1.4%)              |       |
| OS event, n (%)         |                      |                       | 0.321 |
| Alive                   | 149 (29.7%)          | 137 (27.3%)           |       |
| Dead                    | 102 (20.3%)          | 114 (22.7%)           |       |
| DSS event, n (%)        |                      |                       | 0.567 |
| Alive                   | 184 (40.9%)          | 177 (39.3%)           |       |
| Dead                    | 49 (10.9%)           | 40 (8.9%)             |       |
| Age, meidan (IQR)       | 69 (61, 73)          | 68 (62, 73)           | 0.609 |

**Table S13 The relationship between clinical features and NCOA4 expression levels in SARC**

| Characteristic                           | NCOA4 <sup>low</sup> | NCOA4 <sup>high</sup> | p     |
|------------------------------------------|----------------------|-----------------------|-------|
| n                                        | 131                  | 132                   |       |
| Age, n (%)                               |                      |                       | 0.294 |
| <=60                                     | 60 (22.8%)           | 70 (26.6%)            |       |
| >60                                      | 71 (27%)             | 62 (23.6%)            |       |
| Gender, n (%)                            |                      |                       | 1.000 |
| Female                                   | 72 (27.4%)           | 72 (27.4%)            |       |
| Male                                     | 59 (22.4%)           | 60 (22.8%)            |       |
| Histological type, n (%)                 |                      |                       | 0.002 |
| Dedifferentiated liposarcoma             | 19 (7.2%)            | 39 (14.8%)            |       |
| Desmoid Tumor                            | 2 (0.8%)             | 0 (0%)                |       |
| Leiomyosarcoma                           | 59 (22.4%)           | 47 (17.9%)            |       |
| Malignant Peripheral Nerve Sheath Tumors | 4 (1.5%)             | 6 (2.3%)              |       |
| Myxofibrosarcoma                         | 7 (2.7%)             | 18 (6.8%)             |       |
| Pleomorphic Sarcoma                      | 34 (12.9%)           | 18 (6.8%)             |       |
| Synovial Sarcoma                         | 6 (2.3%)             | 4 (1.5%)              |       |
| OS event, n (%)                          |                      |                       | 0.115 |
| Alive                                    | 75 (28.5%)           | 89 (33.8%)            |       |
| Dead                                     | 56 (21.3%)           | 43 (16.3%)            |       |
| DSS event, n (%)                         |                      |                       | 0.107 |
| Alive                                    | 82 (31.9%)           | 93 (36.2%)            |       |
| Dead                                     | 48 (18.7%)           | 34 (13.2%)            |       |
| Age, median (IQR)                        | 63 (53, 73)          | 60 (52, 68)           | 0.341 |

**Table S14 The relationship between clinical features and NCOA4 expression levels in SKCM**

| Characteristic          | NCOA4 <sup>low</sup> | NCOA4 <sup>high</sup> | p            |
|-------------------------|----------------------|-----------------------|--------------|
| n                       | 235                  | 236                   |              |
| Age, n (%)              |                      |                       | 0.885        |
| <=60                    | 127 (27.4%)          | 125 (27%)             |              |
| >60                     | 104 (22.5%)          | 107 (23.1%)           |              |
| Gender, n (%)           |                      |                       | 1.000        |
| Female                  | 89 (18.9%)           | 90 (19.1%)            |              |
| Male                    | 146 (31%)            | 146 (31%)             |              |
| Pathologic stage, n (%) |                      |                       | 0.567        |
| Stage I                 | 35 (8.5%)            | 42 (10.2%)            |              |
| Stage II                | 73 (17.7%)           | 67 (16.3%)            |              |
| Stage III               | 93 (22.6%)           | 78 (18.9%)            |              |
| Stage IV                | 11 (2.7%)            | 13 (3.2%)             |              |
| <b>T stage, n (%)</b>   |                      |                       | <b>0.012</b> |
| T1                      | 24 (6.6%)            | 17 (4.7%)             |              |
| T2                      | 31 (8.5%)            | 48 (13.2%)            |              |
| T3                      | 41 (11.3%)           | 50 (13.7%)            |              |
| T4                      | 91 (25%)             | 62 (17%)              |              |
| N stage, n (%)          |                      |                       | 0.607        |
| N0                      | 113 (27.3%)          | 122 (29.5%)           |              |
| N1                      | 41 (9.9%)            | 33 (8%)               |              |
| N2                      | 24 (5.8%)            | 25 (6%)               |              |
| N3                      | 31 (7.5%)            | 25 (6%)               |              |
| M stage, n (%)          |                      |                       | 0.655        |
| M0                      | 212 (47.9%)          | 206 (46.5%)           |              |
| M1                      | 11 (2.5%)            | 14 (3.2%)             |              |
| <b>OS event, n (%)</b>  |                      |                       | <b>0.005</b> |
| Alive                   | 139 (30%)            | 108 (23.3%)           |              |
| Dead                    | 93 (20%)             | 124 (26.7%)           |              |
| <b>DSS event, n (%)</b> |                      |                       | <b>0.008</b> |
| Alive                   | 148 (32.3%)          | 119 (26%)             |              |
| Dead                    | 81 (17.7%)           | 110 (24%)             |              |
| Age, median (IQR)       | 58 (48, 71)          | 58 (47, 70.25)        | 0.751        |
